# Supplementary material for: DBP and C70 based inverted tandem solar cells using a simple interconnecting layer
Source: Royal Society of Chemistry journal article supplement (doi:10.1039/c7ra04501h), 2017-01-01
Supplement: c7ra04501h1.pdf [file c7ra04501h1.pdf]

# DBP and C<sub>70</sub> Based Inverted Tandem Solar Cells Using Simple Interconnecting Layer

## Supporting Information

Zhongqiang Wang,<sup>\*a</sup> Takeshi Sano,<sup>b</sup> Taojun Zhuang,<sup>b</sup> Hisahiro Sasabe,<sup>b</sup> and Junji Kido<sup>\*b</sup>

<sup>a</sup> Key Laboratory of Interface Science and Engineering in Advanced Materials (Ministry of Education), Research Center of Advanced Materials Science and Technology, Taiyuan University of Technology, Taiyuan, China, 030024. E-mail: wangzhongqiang@tyut.edu.cn.

<sup>b</sup> Department of Organic Device Engineering, Graduate School of Science and Engineering, Research Center for Organic Electronics (ROEL), Yamagata University, 4-3-16 Jonan, Yonezawa, Yamagata 992-8510, Japan. E-mail: kid@yz.yamagata-u.ac.jp.

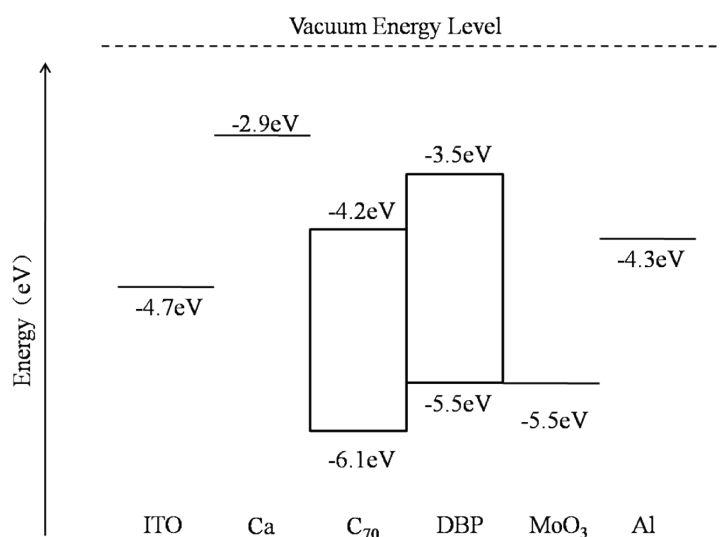

Fig. SI 1 Energy level diagram of inverted structure cells.

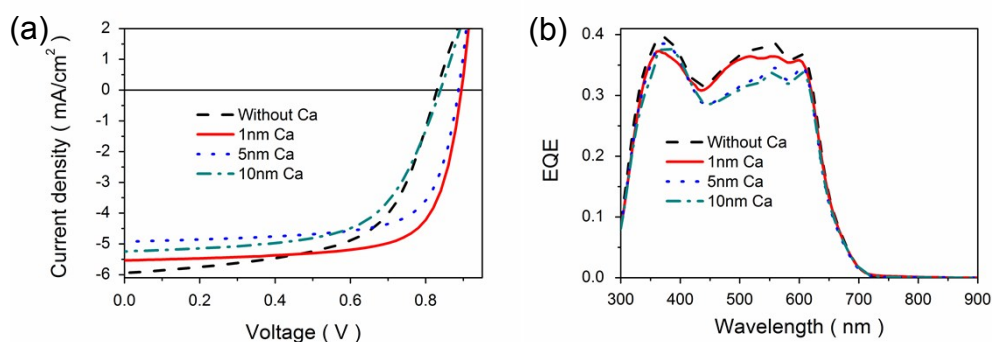

Fig. SI 2 (a) *J-V* curves of inverted structure cells with different Ca thickness under simulated AM1.5G solar illumination at 100 mW/cm<sup>2</sup>. (b) EQE spectra of inverted structure cells with different Ca thickness. Device structure: ITO/Ca( X nm )/C<sub>70</sub>( 40 nm )/DBP( 20 nm )/MoO<sub>3</sub>( 5 nm

)/Al.

Table SI 1 Photovoltaic performances with different Ca thickness.

Device structure: ITO/Ca( X nm )/C<sub>70</sub>( 40 nm )/DBP( 20 nm )/MoO<sub>3</sub>( 5 nm )/Al.

| Ca ( nm ) | $J_{sc}$ ( mA/cm <sup>2</sup> ) | $V_{oc}$ ( V ) | FF (%) | PCE% |
|-----------|---------------------------------|----------------|--------|------|
| 0         | 5.95                            | 0.83           | 60     | 2.97 |
| 1         | 5.56                            | 0.89           | 73     | 3.59 |
| 5         | 4.93                            | 0.89           | 71     | 3.09 |
| 10        | 5.24                            | 0.84           | 62     | 2.73 |

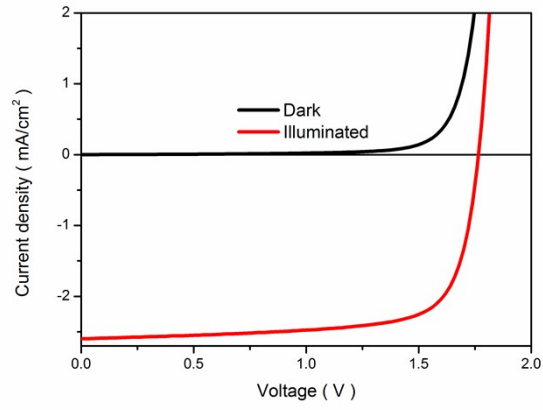

Fig. SI 3  $J$ - $V$  curves of tandem structure cells with different acceptors in front and rear cells under simulated AM1.5G solar illumination at 100 mW/cm<sup>2</sup>.
